# Supplementary material for: Construction of Prochloraz-Loaded Hollow Mesoporous Silica Nanoparticles Coated with Metal–Phenolic Networks for Precise Release and Improved Biosafety of Pesticides
Source: MDPI journal article supplement (doi:10.3390/nano12162885), 2022-08-22
Supplement: s1 [file s1]

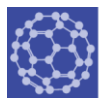

# Construction of Prochloraz-Loaded Hollow Mesoporous Silica Nanoparticles Coated with Metal-Phenolic Networks for Precise Release and Improved Biosafety of Pesticides

Liyin Shi, Qianwei Liang, Qikai Zang, Ze Lv, Xiaohan Meng and Jianguo Feng\*

School of Horticulture and Plant Protection, Yangzhou University, Yangzhou 225009, China

\* Correspondence: jgfeng@yzu.edu.cn

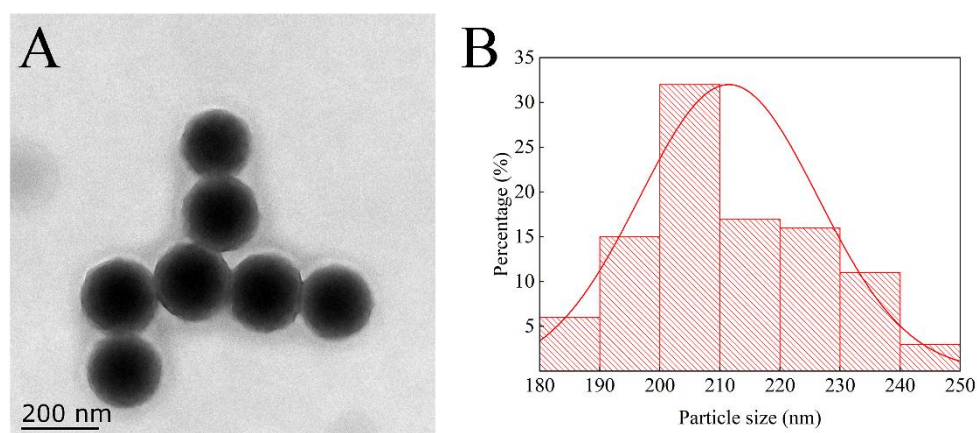

**Figure S1.** TEM images (A) and particle size distribution (B) of polystyrene particles.
